# Supplementary material for: Myosin XIK is a major player in cytoplasm dynamics and is regulated by two amino acids in its tail
Source: PubMed Central journal article supplement — J Exp Bot. 2011 Sep 13;63(1):241–9. doi: 10.1093/jxb/err265 (PMC3245463; doi:10.1093/jxb/err265), 2011-09-13
Supplement: supp_err265_00065474_file007.pdf [file supp_err265_00065474_file007.pdf]

**Table S1 – Primers used in this research.**

| Primer name in lab records | Sequence                          | Primer number | Construct    | Primers used    |
|----------------------------|-----------------------------------|---------------|--------------|-----------------|
| 5KpnINbXIKCBD              | GGGGTACCTCACCAACTGGAAAACTTTATC    | 1             |              |                 |
| NbXIKENDXbaI               | GCTCTAGATCAACTAGAGCGTTGATG        | 2             |              |                 |
| 5KpnINbXIKshort1           | GGGGTACCCAGCAAGCTCTATTTGCTCATTGG  | 3             |              |                 |
| 5KpnINbXIKshort5           | GGGGTACCAGTGCTGGACTTTCAGTTCTC     | 4             |              |                 |
| 3XbaIShort8                | GCTCTAGATCAGGAGTCTTCTGTCATCATAAC  | 5             |              |                 |
| 5KpnINbXIKshort8           | GGGGTACCAGAACATCTCGTGCAAGTTTAGTC  | 6             |              |                 |
| 3XbaINbXIKshort9           | GCTCTAGATCATCTCGGTGCCTGAATACATAGC | 7             |              |                 |
| 3XbaIShort8a               | GCTCTAGATCAGGAGAATGGGATGCTCGAGTC  | 8             |              |                 |
| 5RtoP                      | CTCCTTTTGCGGCCGGAGTGTTGCTCGTTC    | 9             |              |                 |
| 3RtoP                      | GAACGAGCAAACTCCGGCCGCAAAAAGGAG    | 10            |              |                 |
| 5RtoA                      | CTCCTTTTGCGGGCGGAGTGTTGCTCGTTC    | 11            |              |                 |
| 3RtoA                      | GAACGAGCAAACTCCGCCCGCAAAAAGGAG    | 12            |              |                 |
| 5_R1443A                   | CAGCAACTCTATGCGATCAGCACTATGTAC    | 13            |              |                 |
| 3_R1443A                   | GTACATAGTGCTGATCGCATAGAGTTGCTG    | 14            |              |                 |
|                            |                                   |               | Nb XI-K tail | 1+2             |
|                            |                                   |               | Short 1      | 3+2             |
|                            |                                   |               | Short 2      | 4+2             |
|                            |                                   |               | Short 3      | 4+5             |
|                            |                                   |               | Short 4      | 6+2             |
|                            |                                   |               | Short 5      | 1+7             |
|                            |                                   |               | Short 6      | 6+5             |
|                            |                                   |               | Short 7      | 6+8             |
|                            |                                   |               | R1368P       | 1+9, 10+2, 1+2  |
|                            |                                   |               | R1368A       | 1+11, 12+2, 1+2 |
|                            |                                   |               | R1443A       | 1+13, 14+2, 1+2 |

Table S2: Statistical analysis of the Golgi Velocity ( $\mu\text{m}/\text{sec}$ )

| Plant & organelle                   | Treatment     | N <sup>1</sup> | Scheffe group | Mean  | S.D.  | Median | S.E.  |
|-------------------------------------|---------------|----------------|---------------|-------|-------|--------|-------|
| <i>A.t.</i><br>Dominant<br>negative | No Myo        | 763            | A             | 0.779 | 0.422 | 0.715  | 0.015 |
|                                     | XI-A          | 328            | A             | 0.702 | 0.390 | 0.638  | 0.022 |
|                                     | XI-D          | 401            | A             | 0.768 | 0.483 | 0.707  | 0.024 |
|                                     | XI-J          | 515            | A             | 0.812 | 0.451 | 0.758  | 0.020 |
|                                     | ATM1          | 222            | A             | 0.700 | 0.370 | 0.663  | 0.025 |
|                                     | XI-B          | 150            | B             | 0.503 | 0.367 | 0.459  | 0.030 |
|                                     | XI-F          | 564            | B             | 0.660 | 0.391 | 0.611  | 0.016 |
|                                     | XI-G          | 433            | B             | 0.521 | 0.327 | 0.473  | 0.016 |
|                                     | XI-H          | 353            | B             | 0.629 | 0.590 | 0.434  | 0.031 |
|                                     | ATM2          | 430            | B             | 0.634 | 0.332 | 0.597  | 0.016 |
|                                     | VIIIA         | 582            | B             | 0.640 | 0.428 | 0.573  | 0.018 |
|                                     | VIIIB         | 643            | B             | 0.631 | 0.356 | 0.587  | 0.014 |
|                                     | Mya1          | 557            | C             | 0.128 | 0.072 | 0.116  | 0.003 |
|                                     | Mya2          | 262            | C             | 0.131 | 0.061 | 0.112  | 0.004 |
|                                     | XI-C          | 202            | C             | 0.131 | 0.066 | 0.115  | 0.005 |
|                                     | XI-E          | 564            | C             | 0.136 | 0.058 | 0.124  | 0.002 |
| XI-I                                | 189           | C              | 0.177         | 0.068 | 0.177 | 0.005  |       |
| XI-K                                | 104           | C              | 0.122         | 0.052 | 0.106 | 0.005  |       |
| <i>A.t.</i><br>Knockouts            | wt            | 762            | A             | 0.779 | 0.423 | 0.714  | 0.015 |
|                                     | $\Delta$ Mya1 | 445            | B             | 0.692 | 0.455 | 0.633  | 0.022 |
|                                     | $\Delta$ Mya2 | 508            | B             | 0.637 | 0.352 | 0.599  | 0.016 |
|                                     | $\Delta$ XI-C | 853            | B             | 0.707 | 0.410 | 0.646  | 0.014 |
|                                     | $\Delta$ XI-E | 272            | B             | 0.570 | 0.287 | 0.552  | 0.017 |
|                                     | $\Delta$ XI-I | 167            | B             | 0.519 | 0.375 | 0.420  | 0.029 |
|                                     | $\Delta$ XI-K | 619            | C             | 0.182 | 0.126 | 0.138  | 0.005 |
| <i>N.b.</i><br>Dominant<br>negative | No Myo        | 886            | A             | 0.964 | 0.508 | 0.885  | 0.017 |
|                                     | Short 1       | 681            | A             | 0.946 | 0.463 | 0.884  | 0.018 |
|                                     | Short 3       | 875            | A             | 0.919 | 0.453 | 0.862  | 0.015 |
|                                     | Short 5       | 466            | A             | 0.896 | 0.440 | 0.805  | 0.020 |
|                                     | Short 6       | 627            | A             | 0.890 | 0.427 | 0.838  | 0.017 |
|                                     | R1368P        | 698            | A             | 0.907 | 0.491 | 0.814  | 0.019 |
|                                     | R1368A        | 955            | A             | 0.892 | 0.410 | 0.824  | 0.013 |
|                                     | R1443A        | 593            | A             | 0.872 | 0.482 | 0.785  | 0.020 |
|                                     | Short 2       | 889            | B             | 0.366 | 0.148 | 0.360  | 0.005 |
|                                     | Short 7       | 1060           | B             | 0.332 | 0.143 | 0.316  | 0.004 |
|                                     | No Mutation   | 561            | C             | 0.150 | 0.046 | 0.149  | 0.002 |
| Short 4                             | 459           | C              | 0.205         | 0.071 | 0.201 | 0.003  |       |

<sup>1</sup>Number of analyzed organelles. *A.t.* – *Arabidopsis thaliana*. *N.b.* - *Nicotiana benthamiana*.

**A.**

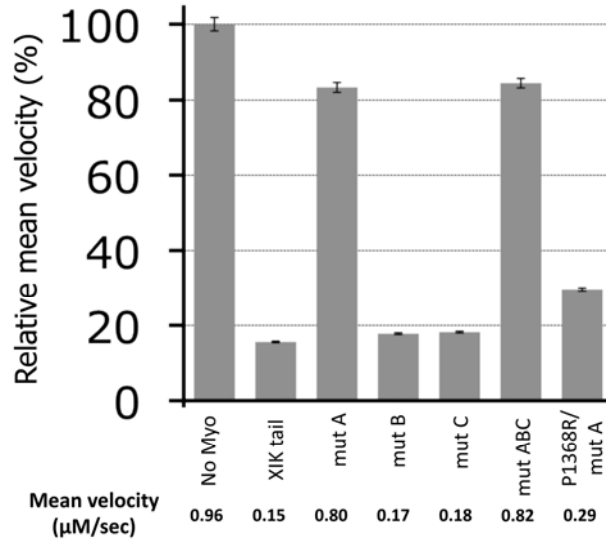

**B.**

A

Nb XI-K 1342 PFLVRKVF**T**QIFSFIN**V**QLFNSLLLRRECCSFSNGEFVKAGLAELE**Q**WCCYATEEYVGS**A**WDE 1404  
 Mutations .....L.....C.....T.P.N...I.....

B C

Nb XI-K 1405 LKH**I**RQAVGFLVIHQPKKTLHEITNELCPVLSIQQLYRISTMYWDDKYGHTVSSDVISSMR 1467  
 Mutations ...T.....K.K.....

Nb XI-K 1468 VMMTEDSNNAVSSSFLLDDSSIPFSVDDISKSIQQVDIADVEPPPLIRENSAFVFLHQ**R**SS\* 1529  
 Mutations .....\*
